# Supplementary material for: Disposable and ultrasensitive label-free gold nanoparticle patterned poly(3,4-ethylenedioxythiophene-co-3-methylthiophene) electrode for electrochemical immunosensing of prostate-specific antigen
Source: Royal Society of Chemistry journal article supplement (doi:10.1039/d4nj02034k), 2024-01-01
Supplement: d4nj02034k1.pdf [file d4nj02034k1.pdf]

## Supplementary Material

for

### **Disposable and ultrasensitive label-free gold nanoparticle patterned poly(3,4-ethylenedioxythiophene-co-3-methylthiophene) electrode for electrochemical immunosensing of prostate-specific antigen**

Selen Uruc<sup>a,b</sup>, Ebrar Dokur<sup>a</sup>, Ozge Gorduk<sup>a</sup>, Yucel Sahin<sup>a\*</sup>

<sup>a</sup>Department of Chemistry, Faculty of Arts and Science, Yildiz Technical University,  
TR34220 Istanbul, Türkiye.

<sup>b</sup>Department of Basic Pharmaceutical Sciences, Faculty of Pharmacy, Biruni University,  
Istanbul, Türkiye.

**\*Corresponding Author:**

Yucel Sahin

Tel: +90 212 3834411

Fax: +90 212 3834134

\*e-mail: [yucelsahin06@gmail.com](mailto:yucelsahin06@gmail.com)

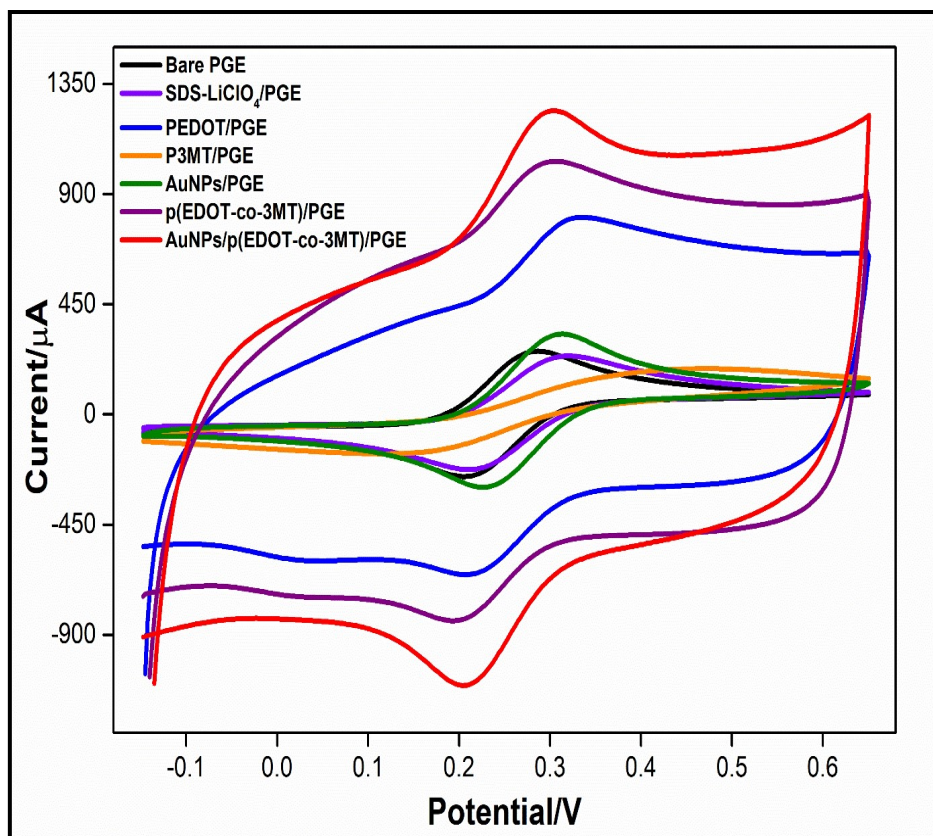

**Fig. S1.** Cyclic voltammograms of AuNPs/p(EDOT-co-3MT)/PGE, p(EDOT-co-3MT)/PGE, AuNPs/PGE, PEDOT/PGE, P3MT/PGE, SDS-LiClO<sub>4</sub>/PGE and Bare PGE in 5.0 mM [Fe(CN)<sub>6</sub>]<sup>3-/4-</sup> solution.

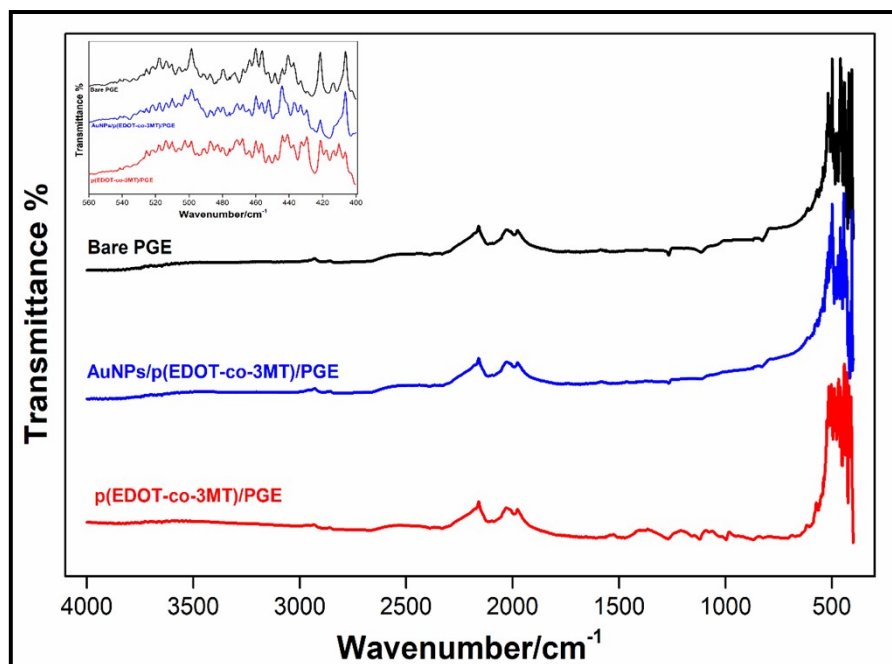

**Fig. S2.** FTIR spectra for bare PGE (black line), p(EDOT-co-3MT)/PGE (red line), and AuNPs/p(EDOT-co-3MT)/PGE (blue line) (inset: fingerprint region).

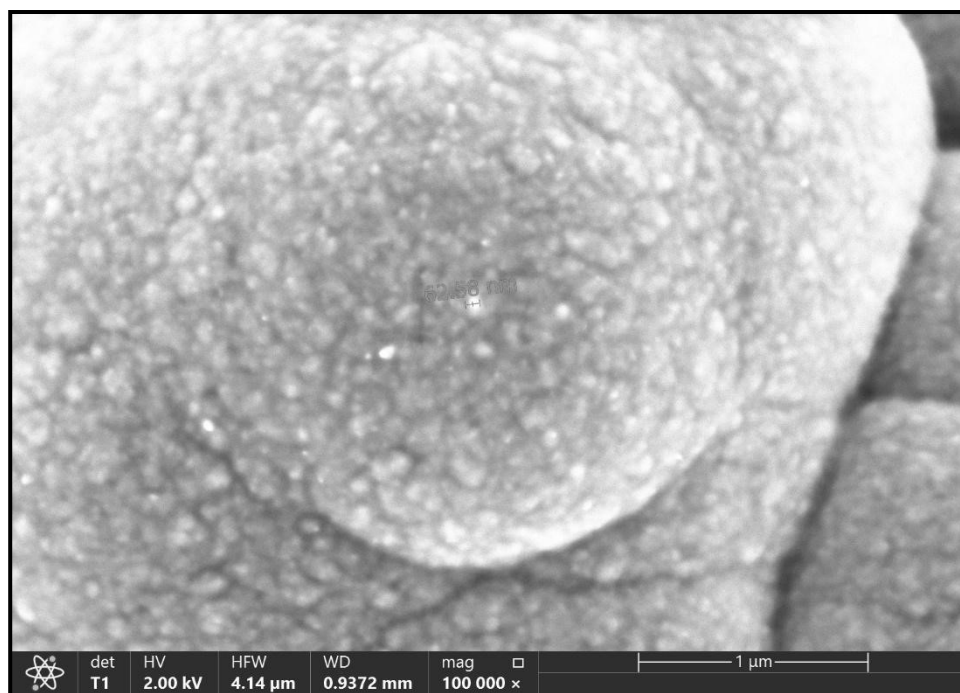

**Fig. S3.** FE-SEM micrograph of p(EDOT-co-3MT)/PGE at 100,000X magnification.

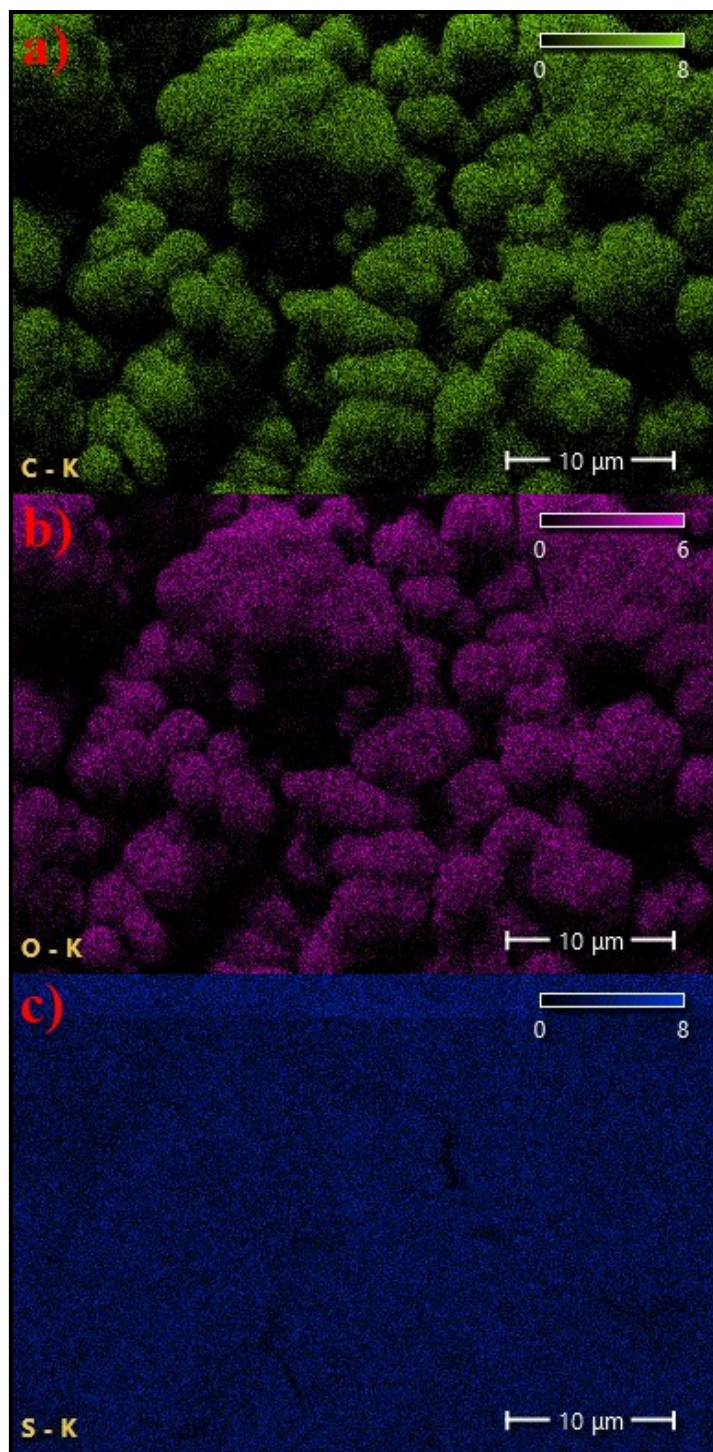

**Fig. S4.** EDS mapping analysis for **a)** C atom, **b)** O atom and **c)** S atom in the p(EDOT-co-3MT)/PGE.

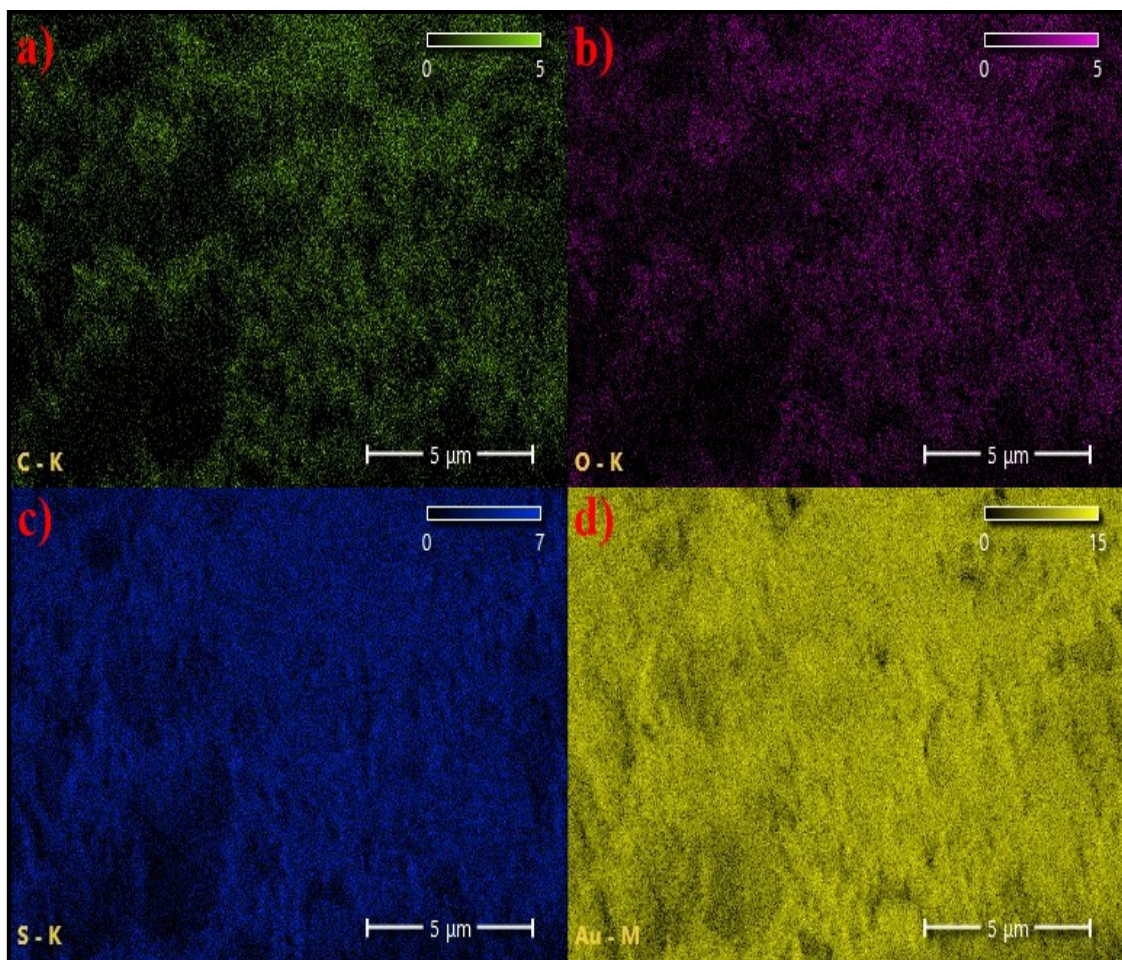

**Fig. S5.** EDS mapping analysis for **a)** C atom, **b)** O atom, **c)** S atom, and **d)** Au atom in the AuNPs/p(EDOT-co-3MT)/PGE.

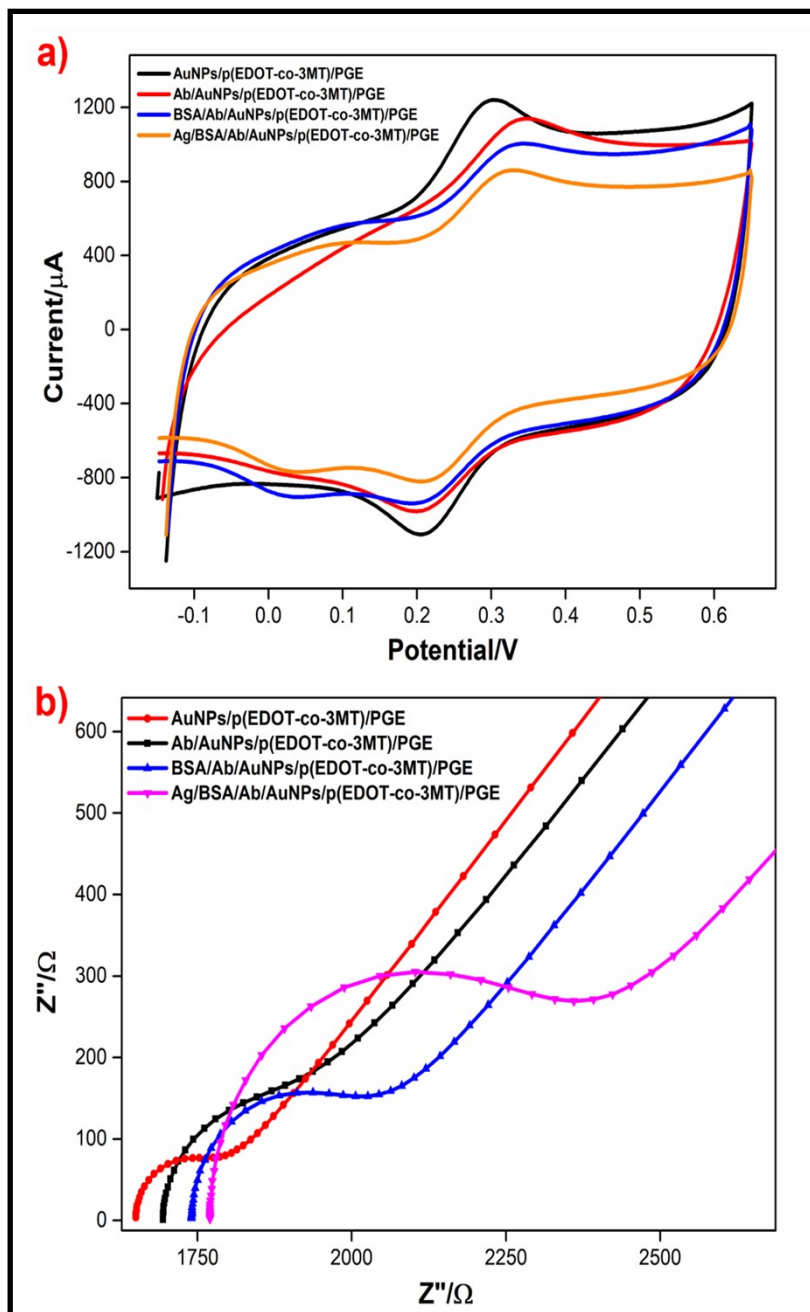

**Fig. S6.** Characterization of the AuNPs/p(EDOT-co-3MT)/PGE, Ab/AuNPs/p(EDOT-co-3MT)/PGE, BSA/Ab/AuNPs/p(EDOT-co-3MT)/PGE and Ag/BSA/Ab/AuNPs/p(EDOT-co-3MT)/PGE by **a)** CV and **b)** EIS.

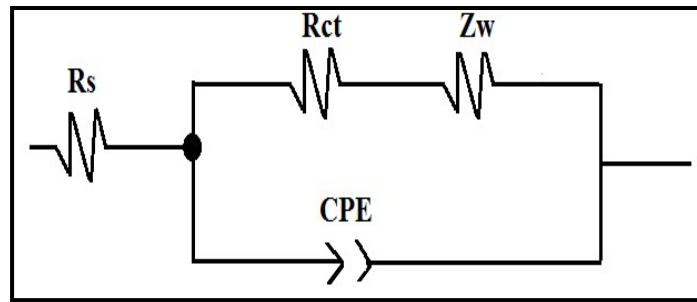

**Fig. S7.** Simple circuit model.



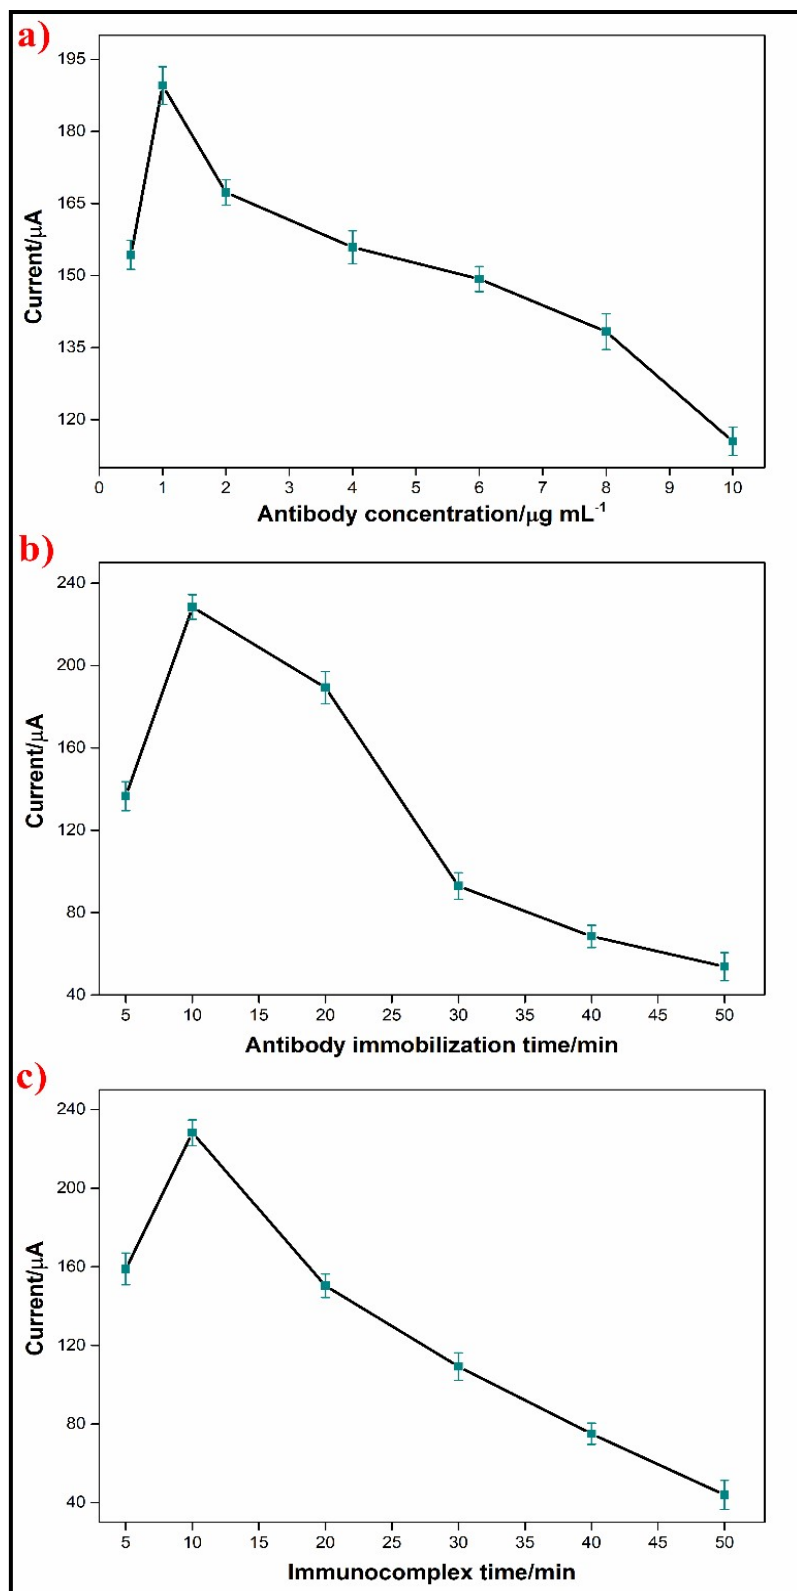

**Fig. S8.** Optimization of **a)** antibody concentration, **b)** antibody immobilization time, and **c)** immunocomplex formation time.

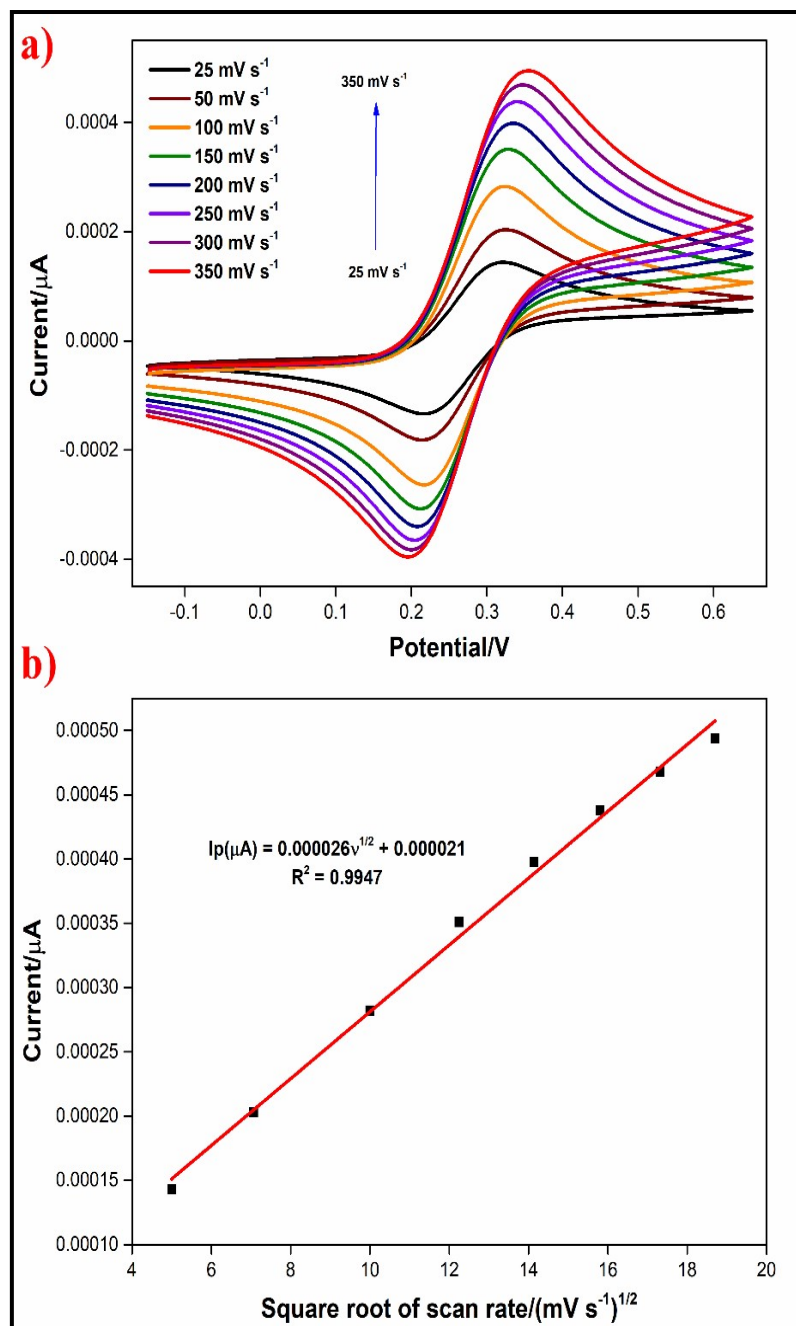

**Fig. S9.** a) Cyclic voltammograms of Bare/PGE in 5.0 mM  $[\text{Fe}(\text{CN})_6]^{3-/4-}$  at different scan rates and b) Relationship between the square root of the scan rate and current.

**Table S1.** Atomic percentages of the Bare/PGE, p(EDOT-co-3MT)/PGE, and AuNPs/p(EDOT-co-3MT)/PGE.

| <b>Electrode</b>          | <b>% C</b> | <b>% O</b> | <b>% Si</b> | <b>% S</b> | <b>% Au</b> |
|---------------------------|------------|------------|-------------|------------|-------------|
| Bare/PGE                  | 96.0       | 2.7        | 3.3         | 0.0        | 0.0         |
| p(EDOT-co-3MT)/PGE        | 50.7       | 34.0       | 0.0         | 15.3       | 0           |
| AuNPs/ p(EDOT-co-3MT)/PGE | 19.1       | 11.0       | 0.0         | 2.4        | 67.5        |
